# Supplementary material for: From fragments to function: data-driven design of high-performance non-fullerene acceptors for organic photovoltaics
Source: Royal Society of Chemistry journal article supplement (doi:10.1039/d5me00182j), 2025-12-08
Supplement: d5me00182j1.pdf [file d5me00182j1.pdf]

# **Supporting Information: From Fragments to Function: Data-Driven Design of High-Performance Non-Fullerene Acceptors for Organic Photovoltaics**

Bibhas Das<sup>1</sup>, Kalyani Patrikar<sup>1</sup>, Atharva Sachin Keny<sup>2</sup>, and Anirban Mondal<sup>1,\*</sup>

<sup>1</sup>Department of Chemistry, Indian Institute of Technology Gandhinagar, Gujarat, 382355, India

<sup>2</sup>Computer Science and Engineering, Indian Institute of Technology Goa, Goa, 403401, India

December 1, 2025

E-mail: amondal@iitgn.ac.in

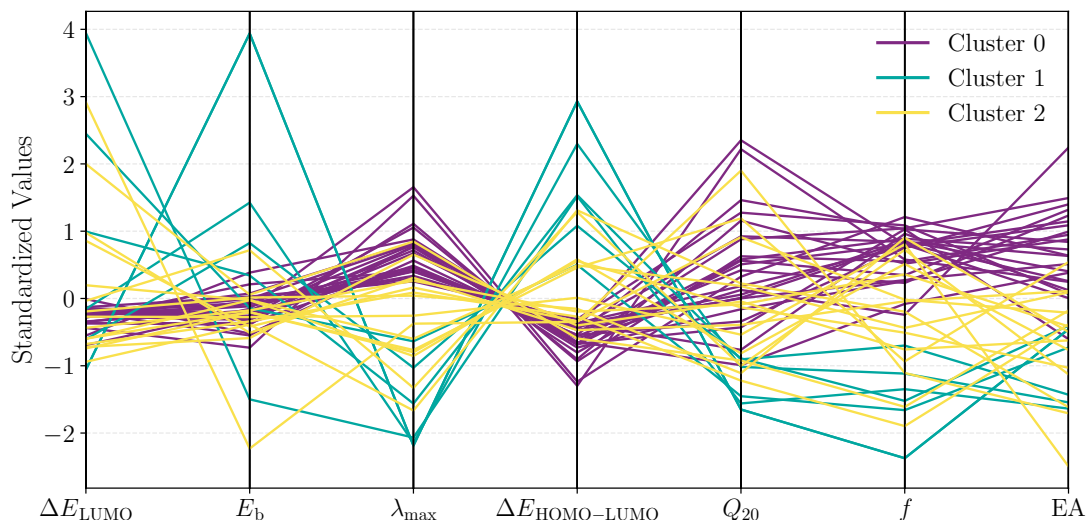

Figure S1: Parallel coordinates plot representing the distribution of key optoelectronic properties across acceptor fragments in the ADA-type non-fullerene acceptor dataset. Each line corresponds to an individual acceptor fragment, and properties are standardized ( $z$ -scores) for comparison across different scales. Distinct clusters are highlighted in color, revealing characteristic property patterns and interdependencies. This visualization facilitates the identification of high-performing acceptor motifs for rational molecular design.

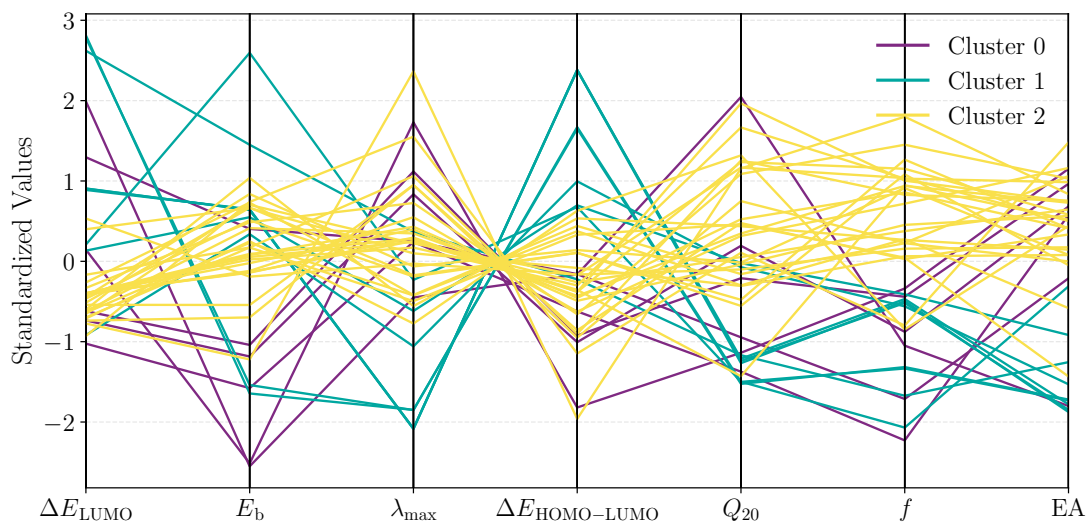

Figure S2: Parallel coordinates plot representing the distribution of key optoelectronic properties across side chain fragments in the ADA-type non-fullerene acceptor dataset. Each line corresponds to an individual side chain fragment, and properties are standardized ( $z$ -scores) for comparison across different scales. Distinct clusters are highlighted in color, revealing characteristic property patterns and interdependencies. This visualization facilitates the identification of high-performing acceptor motifs for rational molecular design.

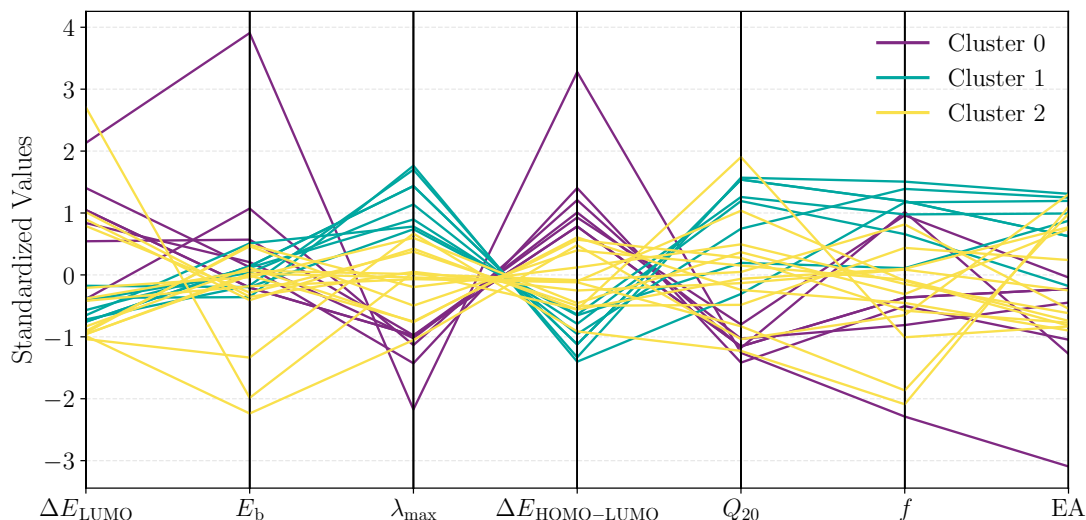

Figure S3: Parallel coordinates plot representing the distribution of key optoelectronic properties across conjugated extension fragments in the ADA-type non-fullerene acceptor dataset. Each line corresponds to an individual conjugated extension fragment, and properties are standardized ( $z$ -scores) for comparison across different scales. Distinct clusters are highlighted in color, revealing characteristic property patterns and interdependencies. This visualization facilitates the identification of high-performing acceptor motifs for rational molecular design.

Table S1: Principal component analysis (PCA) of donor fragment descriptors. The table lists the top seven principal components, their explained variance ratios, and the three most contributing features to each component.

| Component   | Explained Variance Ratio | Top Features (Contribution)                                                                |
|-------------|--------------------------|--------------------------------------------------------------------------------------------|
| Component 1 | 0.479                    | $[\Delta E_{\text{HOMO-LUMO}} (0.51), E_{\text{b}} (0.35), \Delta E_{\text{LUMO}} (0.08)]$ |
| Component 2 | 0.221                    | $[E_{\text{b}} (0.52), Q_{20} (0.49), f (0.49)]$                                           |
| Component 3 | 0.163                    | $[\Delta E_{\text{LUMO}} (0.80), f (0.45), Q_{20} (0.23)]$                                 |
| Component 4 | 0.064                    | $[EA (0.79), \Delta E_{\text{LUMO}} (0.38), E_{\text{b}} (0.19)]$                          |
| Component 5 | 0.041                    | $[f (0.63), \Delta E_{\text{HOMO-LUMO}} (0.08), \lambda_{\text{max}} (-0.26)]$             |
| Component 6 | 0.031                    | $[E_{\text{b}} (0.59), \lambda_{\text{max}} (0.46), f (0.29)]$                             |
| Component 7 | 0.001                    | $[\Delta E_{\text{HOMO-LUMO}} (0.76), \lambda_{\text{max}} (0.63), f (0.06)]$              |

Table S2: Principal component analysis (PCA) of acceptor fragment descriptors. The table lists the top seven principal components, their explained variance ratios, and the three most contributing features to each component.

| Component   | Explained Variance Ratio | Top Features (Contribution)                                                                |
|-------------|--------------------------|--------------------------------------------------------------------------------------------|
| Component 1 | 0.536                    | $[\Delta E_{\text{HOMO-LUMO}} (0.49), E_{\text{b}} (0.32), \Delta E_{\text{LUMO}} (0.07)]$ |
| Component 2 | 0.221                    | $[\Delta E_{\text{LUMO}} (0.72), Q_{20} (0.08), \lambda_{\text{max}} (-0.07)]$             |
| Component 3 | 0.103                    | $[\text{EA} (0.59), \Delta E_{\text{LUMO}} (0.36), \lambda_{\text{max}} (0.26)]$           |
| Component 4 | 0.071                    | $[Q_{20} (0.75), \text{EA} (0.29), \Delta E_{\text{HOMO-LUMO}} (0.13)]$                    |
| Component 5 | 0.042                    | $[f (0.59), \text{EA} (0.42), \Delta E_{\text{LUMO}} (0.46)]$                              |
| Component 6 | 0.025                    | $[E_{\text{b}} (0.68), \lambda_{\text{max}} (0.44), \Delta E_{\text{LUMO}} (0.36)]$        |
| Component 7 | 0.001                    | $[\Delta E_{\text{HOMO-LUMO}} (0.76), \lambda_{\text{max}} (0.61), f (0.02)]$              |

Table S3: Principal component analysis (PCA) of side-chain fragment descriptors. The table lists the top seven principal components, their explained variance ratios, and the three most contributing features to each component.

| Component   | Explained Variance Ratio | Top Features (Contribution)                                                             |
|-------------|--------------------------|-----------------------------------------------------------------------------------------|
| Component 1 | 0.547                    | $[\text{EA} (0.47), \lambda_{\text{max}} (0.46), Q_{20} (0.33)]$                        |
| Component 2 | 0.189                    | $[E_{\text{b}} (0.72), f (0.43), \Delta E_{\text{HOMO-LUMO}} (0.32)]$                   |
| Component 3 | 0.123                    | $[Q_{20} (0.64), f (0.41), \Delta E_{\text{HOMO-LUMO}} (0.14)]$                         |
| Component 4 | 0.063                    | $[Q_{20} (0.62), E_{\text{b}} (0.43), \lambda_{\text{max}} (0.18)]$                     |
| Component 5 | 0.056                    | $[\Delta E_{\text{LUMO}} (0.72), f (0.52), E_{\text{b}} (0.25)]$                        |
| Component 6 | 0.021                    | $[\text{EA} (0.83), \Delta E_{\text{LUMO}} (0.31), \Delta E_{\text{HOMO-LUMO}} (0.26)]$ |
| Component 7 | 0.002                    | $[\Delta E_{\text{HOMO-LUMO}} (0.73), \lambda_{\text{max}} (0.67), \text{EA} (0.03)]$   |

Table S4: Principal component analysis (PCA) of conjugated-extension fragment descriptors. The table lists the top seven principal components, their explained variance ratios, and the three most contributing features to each component.

| Component   | Explained Variance Ratio | Top Features (Contribution)                                                                |
|-------------|--------------------------|--------------------------------------------------------------------------------------------|
| Component 1 | 0.566                    | $[\Delta E_{\text{HOMO-LUMO}} (0.49), \Delta E_{\text{LUMO}} (0.28), E_{\text{b}} (0.27)]$ |
| Component 2 | 0.172                    | $[E_{\text{b}} (0.67), f (0.48), Q_{20} (0.41)]$                                           |
| Component 3 | 0.116                    | $[\Delta E_{\text{LUMO}} (0.86), Q_{20} (0.40), \lambda_{\text{max}} (0.12)]$              |
| Component 4 | 0.076                    | $[f (0.69), \Delta E_{\text{LUMO}} (0.36), \text{EA} (0.31)]$                              |
| Component 5 | 0.054                    | $[E_{\text{b}} (0.60), \lambda_{\text{max}} (0.46), \text{EA} (0.34)]$                     |
| Component 6 | 0.016                    | $[\text{EA} (0.68), Q_{20} (0.46), \Delta E_{\text{HOMO-LUMO}} (0.41)]$                    |
| Component 7 | 0.001                    | $[\Delta E_{\text{HOMO-LUMO}} (0.73), \lambda_{\text{max}} (0.64), f (0.01)]$              |

Table S5: Performance metrics (RMSE, MAE, and Pearson correlation coefficient  $r$ ) for predicting key optoelectronic properties—LUMO offset ( $\Delta E_{\text{LUMO}}$ ), maximum absorption wavelength ( $\lambda_{\text{max}}$ ), oscillator strength ( $f$ ), and exciton binding energy ( $E_{\text{b}}$ )—on the training set using the evidential MPNN model.

| Metrics     | $\Delta E_{\text{LUMO}}$ | $\lambda_{\text{max}}$ | $f$   | $E_{\text{b}}$ |
|-------------|--------------------------|------------------------|-------|----------------|
| RMSE        | 0.169                    | 39.33                  | 0.339 | 0.028          |
| MAE         | 0.095                    | 29.25                  | 0.263 | 0.019          |
| Pearson $r$ | 0.862                    | 0.907                  | 0.945 | 0.909          |
